# Supplementary material for: Recovery of scandium and neodymium from blast furnace slag using acid baking–water leaching
Source: PubMed Central journal article supplement — RSC Adv. 2020 Aug 28;10(53):31936–46. doi: 10.1039/d0ra05797e (PMC9056533; doi:10.1039/d0ra05797e), 2020-08-28
Supplement: RA-010-D0RA05797E-s001.pdf [file RA-010-D0RA05797E-s001.pdf]

## SUPPLEMENTARY INFORMATION

# Recovery of Scandium and Neodymium from Blast Furnace Slag using Acid Baking – Water Leaching

Jihye Kim <sup>a</sup> and Gisele Azimi <sup>\*a,b</sup>

<sup>a</sup> *Laboratory for Strategic Materials, Department of Chemical Engineering and Applied Chemistry, University of Toronto, 200 College Street, Toronto, Ontario, M5S 3E5, Canada*

<sup>b</sup> *Department of Materials Science and Engineering, University of Toronto, 184 College Street, Toronto, Ontario, M5S 3E4, Canada*

\* Corresponding: g.azimi@utoronto.ca

### Supplementary Information Contents

8 Pages (including the cover page)

3 Figures

7 Tables

Figure S1. Photo of the blast furnace slag used in this study.

Figure S2. Block flow diagram of the acid baking – water leaching process.

Figure S3. Particle size distribution of ground blast furnace slag sample.

Table S1. Summary of -1, 0, and +1 factor levels for operating parameters.

Table S2.  $2^{6-2}_{IV}$  experimental design matrix for empirical model building.

Table S3. The ANOVA results for the empirical extraction models of the studied elements.

Table S4. Summary of factor effect coefficients for the studied elements.

Table S5. Experimental conditions for validation tests.

Table S6. Predicted and actual extraction efficiency of scandium and neodymium for validation and optimization tests.

Table S7. Coefficients of determination ( $R^2$ ) showing the pairwise correlations between the extraction efficiency of scandium and neodymium and that of bulk metals.

## Experimental design

Extraction efficiency of target element  $i$  ( $y_i$ ) was calculated as outlined in Eq. (1).

$$y_i = \frac{C_i V_i}{m_o} \times 100 \quad [\text{Eq. 1}]$$

where  $C_i$  is the concentration of the analyte in the leachate,  $V_i$  is the volume of the leachate, and  $m_o$  is the weight of each element in the utilized feed slag sample.

To estimate the extraction efficiency of target elements ( $\hat{y}_i$ ) and predict the optimum conditions, the empirical model shown in Eq. (2) was fit to the experimental data using multiple Linear Least Squares Regression (mLLSR) presented in Eq. (3).

$$\hat{y}_i = \beta_0 + \beta_1 X_1 + \beta_2 X_2 + \beta_3 X_3 + \beta_4 X_4 + \beta_5 X_5 + \beta_6 X_6 \quad [\text{Eq. 2}]$$

where  $\beta$  is the vector containing each of the model parameters,  $\beta_0$  corresponds to the baseline bias for the analyte,  $\beta_1$  corresponds to the baking temperature,  $\beta_2$  corresponds to the acid to slag mass ratio,  $\beta_3$  corresponds to the baking time,  $\beta_4$  corresponds to the water to acid-baked slag ratio,  $\beta_5$  corresponds to the agitation rate, and  $\beta_6$  corresponds to the water to slag mass ratio (before baking).

$$\beta = (X^T X)^{-1} (X^T Y_i) \quad [\text{Eq. 3}]$$

where  $X$  is the experimental design matrix (Table S2), and  $Y_i$  is the response matrix including the actual extraction efficiencies for analyte  $i$ .

The significance of the model parameters was determined using 95% confidence intervals ( $CI_{95\%}$ ), based on a two-tailed t-distribution presented in Eq. (4). The variance of each parameter ( $s_{\beta}^2$ ) was estimated by the square of the pooled standard deviation of the pairs of replicate runs. To simplify the empirical model and leave only the parameters which have a significant effect, any parameters for which the confidence interval includes zero were removed from the model.

$$CI_{95\%} = \beta_j \pm t_{m, 0.05/2} \times \sqrt{\frac{s_{\beta}^2}{n_j}} \quad [\text{Eq. 4}]$$

Analysis of variance (ANOVA) was conducted for the simplified models to assess the goodness of model fit. The coefficient of determination ( $R^2$ ), a measure of the correlation between the measured extraction efficiencies ( $y_i$ ) and the predicted values ( $\hat{y}_i$ ), was determined on the basis of Eq. (5). The significance of the models was evaluated by an  $F$  test (Eq. (6) and (7)), and the adequacy of the models was assessed by an  $R$  test (Eq. (8) and (9)).

$$R^2 = 1 - \frac{ResSS}{TSS_{cfm}} = \frac{RSS_{cfm}}{TSS_{cfm}} = \frac{\sum_{k=1}^p (\hat{y}_{i,k} - \bar{y}_i)^2}{\sum_{k=1}^p (y_{i,k} - \bar{y}_i)^2} \quad [\text{Eq. 5}]$$

$$ResSS = \sum_{k=1}^p (\hat{y}_{i,k} - y_{i,k})^2 = TSS_{cfm} - RSS_{cfm} \quad [\text{Eq. 6}]$$

$$\text{Reject } H_0 \text{ if: } F = \frac{RSS_{cfm}}{ResSS} \times \frac{dof_{ResSS}}{dof_{RSS_{cfm}}} > F_{dof_{RSS_{cfm}}, dof_{ResSS}, 0.05} \quad [\text{Eq. 7}]$$

$$SSLF = ResSS - SSPE = ResSS - s_{\beta}^2 \times m \quad [\text{Eq. 8}]$$

$$\text{Reject } H_0 \text{ if: } R = \frac{SSLF}{SSPE} \times \frac{dof_{SSPE}}{dof_{SSLF}} > F_{dof_{SSLF}, dof_{SSPE}, 0.05} \quad [\text{Eq. 9}]$$



Table S1. Summary of -1, 0, and +1 factor levels for operating parameters.

| Factor         | Factor Description             | Units                 | -1 Level | 0 Level | +1 Level |
|----------------|--------------------------------|-----------------------|----------|---------|----------|
| X <sub>1</sub> | Baking temperature             | °C                    | 200      | 300     | 400      |
| X <sub>2</sub> | Acid to slag mass ratio        | g/g <sub>DBFS</sub>   | 0.50     | 1.25    | 2.00     |
| X <sub>3</sub> | Baking time                    | min                   | 30       | 60      | 90       |
| X <sub>4</sub> | Water to acid-baked slag ratio | mL/g <sub>ABBFS</sub> | 4        | 10      | 16       |
| X <sub>5</sub> | Agitation rate                 | rpm                   | 200      | 400     | 600      |
| X <sub>6</sub> | Water to slag mass ratio       | g/g <sub>DBFS</sub>   | 0        | 1       | 2        |

Table S2.  $2^{6-2}_{IV}$  experimental design matrix for empirical model building.

| Run                               | Baking temperature<br>X <sub>1</sub> (°C) | Acid to slag mass ratio<br>X <sub>2</sub> (g/g <sub>DBFS</sub> ) | Baking time<br>X <sub>3</sub> (min) | Water to acid-baked slag ratio<br>X <sub>4</sub> (mL/g <sub>ABBFS</sub> ) | Agitation rate<br>X <sub>5</sub> (rpm) | Water to slag mass ratio<br>X <sub>6</sub> (g/g <sub>DBFS</sub> ) |
|-----------------------------------|-------------------------------------------|------------------------------------------------------------------|-------------------------------------|---------------------------------------------------------------------------|----------------------------------------|-------------------------------------------------------------------|
| 1                                 | -1                                        | -1                                                               | -1                                  | -1                                                                        | -1                                     | -1                                                                |
| 2                                 | -1                                        | 1                                                                | -1                                  | -1                                                                        | 1                                      | 1                                                                 |
| 3                                 | -1                                        | -1                                                               | 1                                   | -1                                                                        | 1                                      | 1                                                                 |
| 4                                 | -1                                        | 1                                                                | 1                                   | -1                                                                        | -1                                     | -1                                                                |
| 5                                 | -1                                        | -1                                                               | -1                                  | 1                                                                         | -1                                     | 1                                                                 |
| 6                                 | -1                                        | 1                                                                | -1                                  | 1                                                                         | 1                                      | -1                                                                |
| 7                                 | -1                                        | -1                                                               | 1                                   | 1                                                                         | 1                                      | -1                                                                |
| 8                                 | -1                                        | 1                                                                | 1                                   | 1                                                                         | -1                                     | 1                                                                 |
| 9                                 | 1                                         | -1                                                               | -1                                  | -1                                                                        | 1                                      | -1                                                                |
| 10                                | 1                                         | 1                                                                | -1                                  | -1                                                                        | -1                                     | 1                                                                 |
| 11                                | 1                                         | -1                                                               | 1                                   | -1                                                                        | -1                                     | 1                                                                 |
| 12                                | 1                                         | 1                                                                | 1                                   | -1                                                                        | 1                                      | -1                                                                |
| 13                                | 1                                         | -1                                                               | -1                                  | 1                                                                         | 1                                      | 1                                                                 |
| 14                                | 1                                         | 1                                                                | -1                                  | 1                                                                         | -1                                     | -1                                                                |
| 15                                | 1                                         | -1                                                               | 1                                   | 1                                                                         | -1                                     | -1                                                                |
| 16                                | 1                                         | 1                                                                | 1                                   | 1                                                                         | 1                                      | 1                                                                 |
| Center-point tests (3 replicates) | 0                                         | 0                                                                | 0                                   | 0                                                                         | 0                                      | 0                                                                 |
|                                   | 0                                         | 0                                                                | 0                                   | 0                                                                         | 0                                      | 0                                                                 |
|                                   | 0                                         | 0                                                                | 0                                   | 0                                                                         | 0                                      | 0                                                                 |
| -1 level                          | 200                                       | 0.50                                                             | 30                                  | 4                                                                         | 200                                    | 0                                                                 |
| 0 level                           | 300                                       | 1.25                                                             | 60                                  | 10                                                                        | 400                                    | 1                                                                 |
| +1 level                          | 400                                       | 2.00                                                             | 90                                  | 16                                                                        | 600                                    | 2                                                                 |

Table S3. The ANOVA results for the empirical extraction models of the studied elements.

|                                          | Sc      | Nd      |
|------------------------------------------|---------|---------|
| $\bar{Y}$                                | 36.361  | 26.647  |
| TSS                                      | 45104   | 23514   |
| TSS <sub>cfm</sub>                       | 19984   | 10023   |
| RSS                                      | 42191   | 19849   |
| RSS <sub>cfm</sub>                       | 17071   | 6358.6  |
| ResSS                                    | 2912.9  | 3664.7  |
| R <sup>2</sup>                           | 0.85424 | 0.63438 |
| SSPE                                     | 20.990  | 9.7213  |
| SSLF                                     | 2891.9  | 3654.9  |
| F <sub>p,n-p-1,<math>\alpha</math></sub> | 19.437  | 4.6358  |
| F <sub>test</sub>                        | 49.814  | 4.8583  |
| F <sub>vLF,vPE,<math>\alpha</math></sub> | 19.429  | 19.413  |
| R <sub>test</sub>                        | 18.370  | 62.662  |

Table S4. Summary of factor effect coefficients for the studied elements.

| Coefficient | Factor description      | Sc   | Nd   |
|-------------|-------------------------|------|------|
| $\beta_0$   |                         | 36.4 | 26.6 |
| $\beta_1$   | Baking temp.            | -6.1 | -4.9 |
| $\beta_2$   | Acid : Slag             | 32.1 | 17.8 |
| $\beta_3$   | Baking time             | 0.0  | -2.8 |
| $\beta_4$   | Water : Acid-baked slag | 0.0  | 3.7  |
| $\beta_5$   | Agitation rate          | 0.0  | 0.0  |
| $\beta_6$   | Water : Slag            | 0.0  | -5.9 |

Table S5. Experimental conditions for validation tests.

| <b>Run</b>   | <b>X<sub>1</sub></b> | <b>X<sub>2</sub></b> | <b>X<sub>3</sub></b> | <b>X<sub>4</sub></b> | <b>X<sub>5</sub></b> | <b>X<sub>6</sub></b> |
|--------------|----------------------|----------------------|----------------------|----------------------|----------------------|----------------------|
| Validation 1 | 1                    | 1                    | -1                   | 1                    | -1                   | 1                    |
| Validation 2 | 1                    | 1                    | -1                   | 1                    | -1                   | -1                   |

Table S6. Predicted and actual extraction efficiency of scandium and neodymium for validation and optimization tests.

|          | <b>Val 1</b> | <b>Model-Val 1</b> | <b>Val 2</b> | <b>Model-Val 2</b> | <b>Opt</b> | <b>Model-Opt</b> |
|----------|--------------|--------------------|--------------|--------------------|------------|------------------|
| Sc       | 61.3         | 62.3 ± 3.2         | 54.0         | 62.3 ± 3.2         | 82.5 ± 0.7 | 74.6 ± 3.2       |
| Nd       | 32.9         | 40.1 ± 2.2         | 47.1         | 52.0 ± 2.2         | 80.6 ± 7.7 | 61.7 ± 2.2       |
| AARD (%) | 9.8          |                    | 11.4         |                    | 20.6       |                  |

Table S7. Coefficients of determination ( $R^2$ ) showing the pairwise correlations between the extraction efficiency of scandium and neodymium and that of bulk metals (Al, Mg, Ti, Fe, Ca, and Mn).

|           | <b>Al</b> | <b>Mg</b> | <b>Ti</b> | <b>Fe</b> | <b>Ca</b> | <b>Mn</b> |
|-----------|-----------|-----------|-----------|-----------|-----------|-----------|
| <b>Sc</b> | 0.95      | 0.85      | 0.73      | 0.79      | 0.39      | 0.85      |
| <b>Nd</b> | 0.85      | 0.79      | 0.52      | 0.75      | 0.47      | 0.83      |

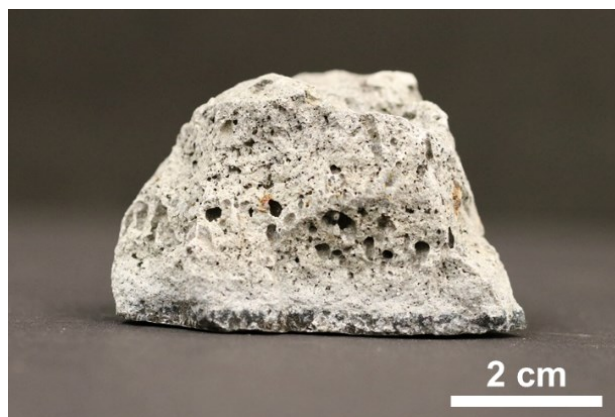

Figure S1. Photo of the blast furnace slag used in this study.

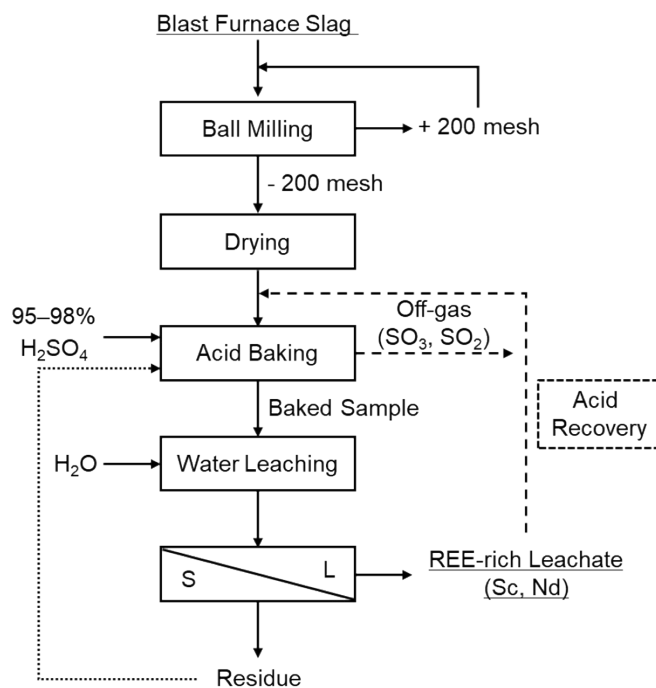

Figure S2. Block flow diagram of the acid baking – water leaching process used in this study.



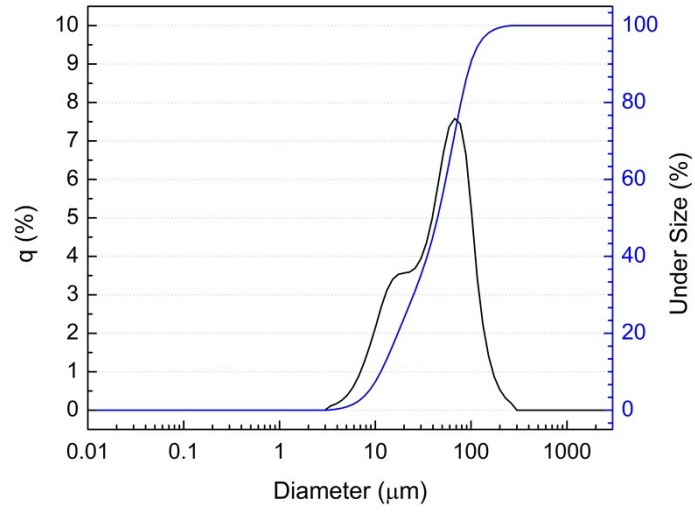

Figure S3. Particle size distribution of ground blast furnace slag sample. The median size is 44.75  $\mu\text{m}$ , mean size is 51.23  $\mu\text{m}$ , D10 is 11.44  $\mu\text{m}$ , and D90 is 98.76  $\mu\text{m}$ .
